# Supplementary material for: A novel alkane monooxygenase (alkB) clade revealed by massive genomic survey and its dissemination association with IS elements
Source: PeerJ. 2022 Sep 28;10:e14147. doi: 10.7717/peerj.14147 (PMC9526415; doi:10.7717/peerj.14147)
Supplement: Table S1 [file peerj-10-14147-s004.xlsx]

## Sheet: Table S1
GCA_000797515.1
GCA_000284615.1
GCA_002005125.1
GCA_002408125.1
GCA_002408145.1
GCA_900110775.1
GCA_005930655.1
GCA_002744715.1
GCA_001447155.2
GCA_019966535.1
GCA_002210165.1
GCA_002312685.1
GCA_002312625.1
GCA_002287725.2
GCA_002312215.1
GCA_002312245.1
GCA_002312585.1
GCA_002312175.1
GCA_002312195.1
GCA_002206285.2
GCA_003833645.1
GCA_002277025.1
GCA_018899035.1
GCA_018900135.1
GCA_013791775.1
GCA_001449905.1
GCA_001895225.1
GCA_000475375.1
GCA_000408945.1
GCA_001591045.1
GCA_000790025.1
GCA_000793985.1
GCA_003986605.1
GCA_018530795.1
GCA_002687555.1
GCA_014762845.1
GCA_000473205.1
GCA_016461905.1
GCA_001574445.1
GCA_913057945.1
GCA_913062635.1
GCA_002692925.1
GCA_009711885.1
GCA_000015365.1
GCA_001620265.1
GCA_003586265.1
GCA_003001655.1
GCA_014637625.1
GCA_004000605.1
GCA_015074805.1
GCA_002162885.1
GCA_000152745.1
GCA_001266795.1
GCA_003363485.1
GCA_020781995.1
GCA_020781935.1
GCA_014196125.1
GCA_003205515.1
GCA_019801405.1
GCA_019802225.1
GCA_011927635.1
GCA_003591655.1
GCA_014235165.1
GCA_000803645.1
GCA_015390225.1
GCA_018129685.1
GCA_011605315.1
GCA_003994855.1
GCA_009363515.1
GCA_009363275.1
GCA_002933295.1
GCA_013169245.1
GCA_002483135.1
GCA_004353225.1
GCA_002776575.1
GCA_013371215.1
GCA_002354635.1
GCA_011290545.1
GCA_003335595.1
GCA_002222635.1
GCA_014359665.1
GCA_017474385.1
GCA_016219575.1
GCA_001312945.1
GCA_003476985.1
GCA_018129505.1
GCA_000465325.1
GCA_018130025.1
GCA_012274525.1
GCA_001556045.1
GCA_014530645.1
GCA_018129925.1
GCA_018129965.1
GCA_018129805.1
GCA_018129785.1
GCA_018129935.1
GCA_018129755.1
GCA_018129705.1
GCA_018129645.1
GCA_000233915.4
GCA_002216105.1
GCA_900182625.1
GCA_001010505.1
GCA_001602255.1
GCA_000009365.1
GCA_913058525.1
GCA_002837115.1
GCA_000524665.1
GCA_013371485.1
GCA_009898855.1
GCA_001932535.1
GCA_000582555.1
GCA_000355675.1
GCA_913058015.1
GCA_014359475.1
GCA_002683435.1
GCA_000475255.1
